# Supplementary material
Source: PubMed Central journal article supplement (PMC6544370)
Supplement: NIHMS1518858-supplement-3.pdf [file NIHMS1518858-supplement-3.pdf]

## Supplementary Discussion

Identifying CD-NTases encoded by target organisms is challenging due to high sequence divergence. Below is a guide to locating CD-NTases in a given strain or identifying specific strains/organisms that encode a CD-NTase of interest. Please also see the previous analysis by Burroughs et al., *NAR* (2015), in which the authors carried out initial operon-structure guided bioinformatics. Additionally, below is a guide to classifying the clade association of a newly described CD-NTase.

### To identify if a given bacterial strain encodes an already annotated CD-NTase:

Download the supplemental table “Supplementary Table 2-CD-NTases and CD-NTase encoding bacteria.xls.” Search this table for strain names, organism species, or other database identifiers. This spreadsheet can also be searched for a specific CD-NTase to identify bacterial strains encoding that gene. Make sure to search all tabs of data as this document has multiple datasets. Upon locating the bacterial strain/gene, use the associated NCBI accession number to further locate sequence, ordered locus, and genomic information. The three tabs in Supplementary Table 2 are:

- (1) “Type CD-NTases Screened” providing information on specific enzymes screened in Fig. 4a–c and Extended Data Fig. 6c–g.
- (2) “Non-redundant CD-NTase Records” providing information on every CD-NTase sequence used for phylogenetic analysis, protein alignment construction, and Fig. 4a. These data represent the total sequence diversity of CD-NTases but each record may represent multiple bacterial isolates encoding identical proteins. The left-most column represents the order of CD-NTases in the alignment/tree and proceeds clockwise from “G”. For full alignment, see .network, FASTA, and .geneious files provided as source data for Figure 4a.
- (3) “Compiled CD-NTase IPG Records” providing a list of all records of CD-NTases found within the Identical Protein Groups tool at NCBI. This list is semi-redundant but contains complete strain and organism specific identifiers.

### To identify CD-NTases within any given organism by BLAST:

An additional method of identifying CD-NTase genes encoded by an organism of interest is to BLAST the complete list of type CD-NTases using their NCBI identifiers, found in tab (1) of Supplementary Table 1 using these steps:

- 1) Copy complete list of type CD-NTase identifiers (below)
- 2) Using a BLAST-P search (<https://blast.ncbi.nlm.nih.gov/Blast.cgi>), paste the identifiers in to the box “Enter accession number”
- 3) Define the organism and strain to search in the query box “Organism”
- 4) Click “BLAST” button.

### To identify CD-NTases within any given organism by conserved domain:

One can also browse for the conserved domains that describe CD-NTase family proteins. Please note that sequences annotated with these conserved domain descriptions may be other pol- $\beta$ -like nucleotidyltransferases and not specifically CD-NTase family members.

- Pfam domains: Mab-21 protein domain (PF03281), PAP\_central domain (PF04928), N-terminal Pol- $\beta$ -like nucleotidyltransferase core domain (PF14792 and PF01909), C-terminal OAS1\_C domain (PF10421), C-terminal tRNA-NucTransf2 domain (PF9249)
- EuKaryotic Orthologous Groups (KOG) database: KOG3963, KOG2245, KOG3792, KOG37933
- Clusters of Orthologous Groups (COG): COG5186, COG1746, COG1665, COG1669
- NCBI conserved domain database: CD05402, CD05400, CD5397

## To classify the designated clade/cluster of a new unique CD-NTase:

Align the CD-NTase amino acid sequence of interest to the sequences in tab (2) "Non-redundant CD-NTase Records". Sequences can also be found in alignment supplementary data files. Compare newly described CD-NTase to neighboring proteins based on alignment. A CD-NTase is considered a member of a clade/cluster if it shares >24.5% amino acid identity with other members of that clade/cluster.

## Type CD-NTase identifiers for BLAST analysis:

WP\_001901330.1  
WP\_001593454.1  
WP\_023121145.1  
WP\_016849025.1  
WP\_020363757.1  
WP\_031517737.1  
KDD27955.1  
WP\_032579276.1  
WP\_016268104.1  
WP\_012995826.1  
WP\_000058223.1  
WP\_017897513.1  
WP\_023633898.1  
WP\_002302472.1  
WP\_044727581.1  
WP\_000995828.1  
WP\_005836899.1  
WP\_026109030.1  
EFJ98156.1  
WP\_001534692.1  
WP\_023223657.1  
WP\_005110610.1  
YP\_635404.1  
WP\_003090158.1  
WP\_001279388.1  
WP\_000246637.1  
WP\_031517014.1  
WP\_000246636.1  
EIQ80517.1  
WP\_044779457.1  
WP\_008409465.1  
WP\_002106335.1  
WP\_000019626.1  
WP\_000763718.1  
WP\_003305997.1  
WP\_009895113.1  
WP\_043964485.1  
EEH69894.1  
WP\_032676400.1  
NP\_766712.1  
WP\_023727438.1  
WP\_004556387.1  
WP\_032942206.1  
WP\_001056752.1  
WP\_031656629.1  
WP\_044359458.1  
WP\_013858317.1  
WP\_015376200.1  
EKS31071.1  
WP\_006018769.1  
WP\_008253492.1  
WP\_012997810.1  
WP\_023568228.1  
WP\_000072410.1  
WP\_017790128.1  
WP\_006482377.1  
WP\_001593458.1  
WP\_042646516.1  
WP\_041847730.1  
WP\_000899483.1  
WP\_062726309.1  
WP\_054878246.1  
WP\_009654824.1  
EGH79124.1  
WP\_009929206.1  
WP\_000102010.1  
WP\_002347527.1  
WP\_014072508.1  
WP\_016200549.1

**Supplementary Table 1. Summary of data collection, phasing and refinement statistics**

|                                                     | Rm-CdnE<br><i>Apo</i><br>(6E0K)                | Rm-CdnE<br>Upnpp, Apcpp<br>(6E0L)              | Rm-CdnE<br><i>Apo</i><br>(Se-SAD)              | Em-CdnE<br><i>Apo</i><br>(6E0M)                | Em-CdnE<br>GTP, Apcpp<br>(6E0N)                | Em-CdnE<br>pppA[3'-5']pA<br>(6E0O)             | Em-CdnE<br>(S-SAD)                             | RECON<br>cAAG<br>(6M7K)                        |
|-----------------------------------------------------|------------------------------------------------|------------------------------------------------|------------------------------------------------|------------------------------------------------|------------------------------------------------|------------------------------------------------|------------------------------------------------|------------------------------------------------|
| <b>Data collection</b>                              |                                                |                                                |                                                |                                                |                                                |                                                |                                                |                                                |
| Space group                                         | P 2 <sub>1</sub> 2 <sub>1</sub> 2 <sub>1</sub> |
| Cell dimensions                                     |                                                |                                                |                                                |                                                |                                                |                                                |                                                |                                                |
| <i>a</i> , <i>b</i> , <i>c</i> (Å)                  | 52.53, 66.33,<br>89.21                         | 51.65, 65.65,<br>88.86                         | 52.70, 66.60,<br>89.37                         | 57.19, 58.23,<br>99.45                         | 57.02, 58.24,<br>99.52                         | 57.07, 58.61,<br>99.48                         | 56.85, 58.54,<br>99.60                         | 50.60, 57.07,<br>110.76                        |
| $\alpha$ , $\beta$ , $\gamma$ (°)                   | 90.0, 90.0, 90.0                               | 90.0, 90.0, 90.0                               | 90.0, 90.0, 90.0                               | 90.0, 90.0, 90.0                               | 90.0, 90.0, 90.0                               | 90.0, 90.0, 90.0                               | 90.0, 90.0, 90.0                               | 90.0, 90.0, 90.0                               |
| Wavelength                                          | 1.00001                                        | 0.97910                                        | 0.97940                                        | 0.97920                                        | 0.97918                                        | 0.97918                                        | 1.71370                                        | 0.97910                                        |
| Resolution (Å) <sup>a</sup>                         | 37.39–1.60<br>(1.63–1.60)                      | 36.92–2.25<br>(2.32–2.25)                      | 45.40–2.29<br>(2.37–2.29)                      | 49.58–1.52<br>(1.54–1.52)                      | 37.83–1.50<br>(1.52–1.50)                      | 37.92–1.25<br>(1.27–1.25)                      | 37.93–1.99<br>(2.05–1.99)                      | 46.02–1.10<br>(1.12–1.10)                      |
| <i>R</i> <sub>pim</sub>                             | 2.4 (12.1)                                     | 6.8 (30.4)                                     | 2.6 (26.9)                                     | 3.3 (62.3)                                     | 4.3 (74.5)                                     | 2.5 (45.7)                                     | 1.5 (6.1)                                      | 2.9 (29.8)                                     |
| <i>I</i> / $\sigma$ ( <i>I</i> )                    | 18.0 (4.6)                                     | 9.8 (3.0)                                      | 26.1 (2.9)                                     | 13.6 (1.4)                                     | 10.6 (1.2)                                     | 13.9 (1.6)                                     | 35.7 (14.3)                                    | 14.0 (2.6)                                     |
| <i>CC</i> <sub>1/2</sub>                            | 99.9 (96.0)                                    | 99.2 (81.7)                                    | 99.9 (80.3)                                    | 99.9 (54.7)                                    | 99.8 (42.6)                                    | 99.9 (63.1)                                    | 99.9 (97.4)                                    | 99.9 (81.3)                                    |
| Completeness<br>(%)                                 | 99.7 (95.0)                                    | 99.1 (94.7)                                    | 97.5 (79.9)                                    | 99.8 (96.1)                                    | 99.7 (95.0)                                    | 99.9 (98.7)                                    | 95.7 (86.3)                                    | 99.7 (97.5)                                    |
| Redundancy                                          | 6.7 (5.4)                                      | 5.3 (4.4)                                      | 81.1 (53.2)                                    | 12.9 (8.5)                                     | 6.7 (6.0)                                      | 6.7 (6.4)                                      | 72.8 (62.3)                                    | 9.1 (8.2)                                      |
| <b>Refinement</b>                                   |                                                |                                                |                                                |                                                |                                                |                                                |                                                |                                                |
| Resolution (Å)                                      | 37.39–1.60                                     | 36.92–2.25                                     |                                                | 49.58–1.52                                     | 37.83–1.50                                     | 37.92–1.25                                     |                                                | 46.02–1.10                                     |
| No. reflections                                     |                                                |                                                |                                                |                                                |                                                |                                                |                                                |                                                |
| Total                                               | 282,982                                        | 78,899                                         |                                                | 669,261                                        | 361,682                                        | 621,541                                        |                                                | 1,185,904                                      |
| Unique                                              | 41,925 (1,925)                                 | 14,799 (1,263)                                 |                                                | 52,028 (2,474)                                 | 53,857 (2,464)                                 | 92,915 (4,497)                                 |                                                | 130,194 (6242)                                 |
| Free (%)                                            | 5                                              | 5                                              |                                                | 3.9                                            | 3.9                                            | 3.9                                            |                                                | 2                                              |
| <i>R</i> <sub>work</sub> / <i>R</i> <sub>free</sub> | 16.4 / 18.6                                    | 18.2 / 21.7                                    |                                                | 13.9 / 17.6                                    | 15.5 / 18.0                                    | 14.2 / 16.4                                    |                                                | 14.3 / 15.7                                    |
| No. atoms                                           |                                                |                                                |                                                |                                                |                                                |                                                |                                                |                                                |
| Protein                                             | 2457                                           | 2426                                           |                                                | 2256                                           | 2239                                           | 2328                                           |                                                | 2644                                           |
| Ligand                                              |                                                | 61                                             |                                                | 9 (PPi)                                        | 96                                             | 63                                             |                                                | 83 (cAAG, EtGl)                                |
| Water                                               | 442                                            | 177                                            |                                                | 326                                            | 343                                            | 377                                            |                                                | 537                                            |
| <i>B</i> factors                                    |                                                |                                                |                                                |                                                |                                                |                                                |                                                |                                                |
| Protein                                             | 21.6                                           | 23.8                                           |                                                | 19.8                                           | 19.6                                           | 17.66                                          |                                                | 9.9                                            |
| Ligand                                              |                                                | 38.9                                           |                                                | 27.8                                           | 38.9                                           | 32.54                                          |                                                | 12.5                                           |
| Water                                               | 33.0                                           | 31.4                                           |                                                | 34.4                                           | 33.1                                           | 31.96                                          |                                                | 24.5                                           |
| r.m.s deviations                                    |                                                |                                                |                                                |                                                |                                                |                                                |                                                |                                                |
| Bond lengths (Å)                                    | 0.006                                          | 0.008                                          |                                                | 0.008                                          | 0.005                                          | 0.007                                          |                                                | 0.011                                          |
| Bond angles (°)                                     | 0.802                                          | 1.06                                           |                                                | 1.11                                           | 1.06                                           | 1.30                                           |                                                | 1.421                                          |

Single crystals were used to collect data for each structure.

<sup>a</sup> Values in parentheses are for highest-resolution shell.

## Supplementary Figure 1

Original source images for data obtained by electrophoretic separation  
Extended Data Figure 5d

700 channel

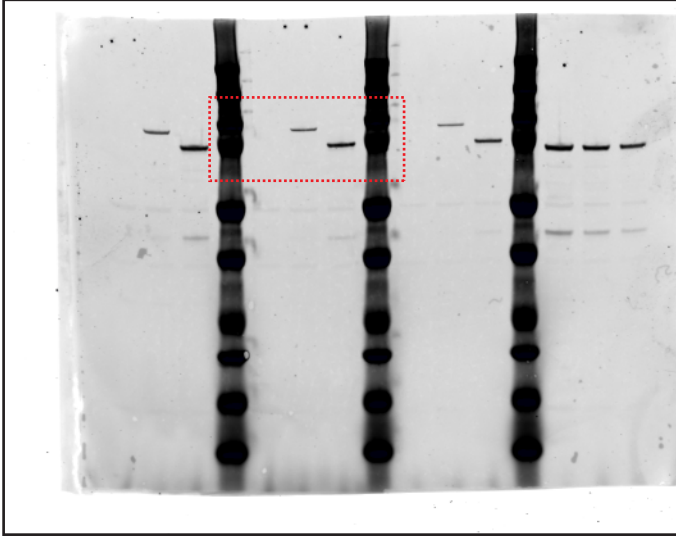

**Western blot** of one gel/membrane probed with 2 sets of primary and secondary antibodies simultaneously, visualized in two fluorescence channels

**Primary antibodies** 1:5,000 Rabbit anti-MBP (Millipore Cat# AB3596, RRID:AB\_91531) and 1:10,000 Mouse anti-Tubulin (Millipore Cat# MABT205, RRID:AB\_11204167)

**Secondary antibodies** 1:10,000 IRDye 680RD Goat anti-Rabbit IgG (LI-COR Biosciences Cat# 925-68071, RRID:AB\_2721181) and IRDye 800CW Goat anti-Mouse IgG (LI-COR Biosciences Cat# 925-32210, RRID:AB\_2687825)

**Ladder** Bio-rad Precision Plus Protein Dual Color Standard

800 channel

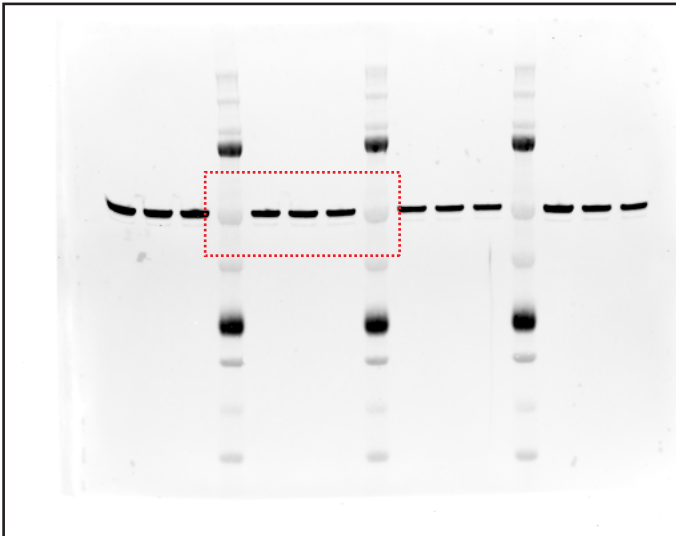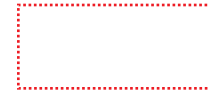

Approximate location of cropped images  
Extended Data Figure 5d
